# Supplementary material for: Biological observations in microbiota analysis are robust to the choice of 16S rRNA gene sequencing processing algorithm: case study on human milk microbiota
Source: PubMed Central journal article supplement (PMC7501722; doi:10.1186/s12866-020-01949-7), 2020-09-18

**Supplementary Material for “Biological observations in microbiota analysis are robust to the choice of 16S rRNA gene sequencing processing algorithm: case study on human milk microbiota” (Moossavi et. al.)**

### **Supplementary Tables & Figures**

**Table S1. Comparison of the number of OTUs/ASVs in the mock community, negative controls, and milk microbiota datasets processed by clustering-based OTU method (Qiime1) and a denoising algorithm (Qiime2) with or without contaminant removal.**

**Table S2. Prevalence of classified genera in datasets processed by Qiime1 and Qiime2 after excluding OTUs/ASVs with less than 20 reads across each dataset (See the supplementary excel file).**

**Table S3. Comparison of prevalence and relative abundance of shared genera in milk microbiota processed by clustering-based OTU method (Qiime1) and a denoising algorithm (Qiime2) without contaminant removal.**

**Table S4. Prevalence of classified genera in datasets processed by Qiime1 and Qiime2 after excluding OTUs/ASVs with less than 20 reads across each dataset and mean relative abundance of less than 0.01% (See the supplementary excel file).**

**Figure S1. Comparison of the library size on datasets processed by clustering-based OTU method (Qiime1) and a denoising algorithm (Qiime2) with or without contaminant removal.**

**Figure S2. Comparison of the prevalence of bacterial genera on datasets processed by clustering-based OTU method (Qiime1) and a denoising algorithm (Qiime2) without contaminant removal.**

**Figure S3. Distribution of classified genera in Qiime1 and Qiime2 processed datasets without**

**contaminant removal.**

**Figure S4. Comparison of the relative abundance and prevalence of abundant bacterial genera (>0.01% mean relative abundance) on datasets processed by clustering-based OTU method (Qiime1) and a denoising algorithm (Qiime2) without contaminant removal.**

**Figure S5. Comparison of the composition of abundant taxa (>1% mean relative abundance) on datasets processed by clustering-based OTU method (Qiime1) and a denoising algorithm (Qiime2) with or without contaminant removal.**

**Table S1. Comparison of the number of OTUs/ASVs in the mock community, negative controls, and milk microbiota datasets processed by clustering-based OTU method (Qiime1) and a denoising algorithm (Qiime2) with or without contaminant removal**

|                                                                                 | Qiime1     |           | Qiime2     |           |
|---------------------------------------------------------------------------------|------------|-----------|------------|-----------|
|                                                                                 | Yes        | No        | Yes        | No        |
| Sequence filtering <sup>a</sup>                                                 | Yes        |           | No         |           |
| Reference database                                                              | Greengenes |           | Greengenes |           |
| Similarity threshold for taxonomy assignment                                    | 97%        |           | 99%        |           |
| Contaminant identification & removal                                            | -          | +         | -          | +         |
| Sequencing depth (x1000)                                                        | 51.1±21.2  | 51.0±21.1 | 48.6±19.2  | 47.7±18.6 |
| Mock community of 8 species (N=18 <sup>b</sup> )                                |            |           |            |           |
| Average Number of OTUs/ASVs per sample                                          | 223±50     | 215±49    | 12±3       | 9±3       |
| Negative control (N=15)                                                         |            |           |            |           |
| Average Number of OTUs/ASVs per sample                                          | 58±94      | 14±20     | 42±65      | 25±35     |
| Milk samples (N=428)                                                            |            |           |            |           |
| Total number of OTUs/ASVs                                                       | 13,305     | 12,695    | 9,884      | 9,711     |
| Average Number of OTUs/ASVs per sample                                          | 364±145    | 358±132   | 170±73     | 168±70    |
| Milk samples after filtering (N=393) <sup>c</sup>                               |            |           |            |           |
| Remaining OTUs/ASVs after filtering                                             | 2,265      | 2,134     | 1,956      | 1,972     |
| Average Number of OTUs/ASVs per sample                                          | 394±91     | 445±142   | 149±44     | 147±44    |
| OTUs/ASVs > 0.01% average relative abundance <sup>d</sup>                       | 298        | 298       | 299        | 301       |
| Average number of OTUs/ASVs per sample after additional filtering <sup>de</sup> | 18±7       | 18±7      | 18±6       | 18±6      |

<sup>a</sup> Low quality base calling scores (<20) and containing ambiguous bases in the overlapping region

<sup>b</sup> 3 replicates per PCR reaction (n=3) for each sequencing run (n=2)

<sup>c</sup> Exclusion of OTUs/ASVs not present in the samples or belonging to non-bacterial taxa, rarefaction to 25000 reads per sample, filtering OTUs/ASVs with less than 20 reads across each dataset

<sup>d</sup> Despite the similarity in the number of OTUs/ASVs, the composition is not identical (See **Figure 1, S4, and S5**).

<sup>e</sup> Excluding OTUs/ASVs with less than <1% mean relative abundance

**Table S3. Comparison of prevalence and relative abundance of shared genera in milk microbiota processed by clustering-based OTU method (Qiime1) and a denoising algorithm (Qiime2) without contaminant removal.**

| Features                                                                | Method                       | Phylum                            |                                   |                                    |                                   |
|-------------------------------------------------------------------------|------------------------------|-----------------------------------|-----------------------------------|------------------------------------|-----------------------------------|
|                                                                         |                              | Proteobacteria                    | Firmicutes                        | Actinobacteria                     | Bacteroides                       |
| <b>OTUs/ASVs with more than 20 total read count across each dataset</b> |                              |                                   |                                   |                                    |                                   |
| OTUs/ASVs                                                               | <b>Qiime1</b>                | N=2265                            |                                   |                                    |                                   |
|                                                                         | <b>Qiime2</b>                | N =1956                           |                                   |                                    |                                   |
| OTUs/ASVs with genus classification                                     | <b>Qiime1</b>                | N=1385                            |                                   |                                    |                                   |
|                                                                         | <b>Qiime2</b>                | N=1378                            |                                   |                                    |                                   |
| Genera common to both / total                                           | N <sub>total</sub> = 219/343 | 100/163                           | 55/83                             | 40/61                              | 24/36                             |
| Unique genera / total for methods                                       | <b>Qiime1</b>                | 26/126                            | 11/66                             | 26/66                              | 6/30                              |
|                                                                         | <b>Qiime2</b>                | 37/137                            | 17/72                             | 8/48                               | 6/30                              |
| Correlation between methods (95% CI) *                                  | Prevalence                   | r=0.66<br>(0.56, 0.74)<br>p<0.001 | r=0.79<br>(0.70, 0.86)<br>p<0.001 | r=0.58<br>(0.38, 0.73)<br>p<0.001  | r=0.80<br>(0.64, 0.89)<br>p<0.001 |
|                                                                         | Mean Relative abundance      | r=0.72<br>(0.63, 0.78)<br>p<0.001 | r=1<br>(1, 1)<br>p<0.001          | r=0.69<br>(0.53, 0.80)<br>p<0.001  | r=1<br>(1,1)<br>p<0.001           |
| <b>OTUs/ASVs with at least 0.01% mean relative abundance</b>            |                              |                                   |                                   |                                    |                                   |
| OTUs/ASVs                                                               | <b>Qiime1</b>                | N=298                             |                                   |                                    |                                   |
|                                                                         | <b>Qiime2</b>                | N =299                            |                                   |                                    |                                   |
| OTUs/ASVs with genus classification                                     | <b>Qiime1</b>                | N=195                             |                                   |                                    |                                   |
|                                                                         | <b>Qiime2</b>                | N=234                             |                                   |                                    |                                   |
| Genera common to both / total                                           | N <sub>total</sub> = 65/106  | 40/67                             | 11/17                             | 8/12                               | 6/10                              |
| Unique Genera / total for algorithm                                     | <b>Qiime1</b>                | 9/49                              | 3/14                              | 1/9                                | 3/9                               |
|                                                                         | <b>Qiime2</b>                | 18/58                             | 3/14                              | 3/11                               | 1/7                               |
| Correlation between methods (95% CI) *                                  | Prevalence                   | r=0.30<br>(0.06, 0.50)<br>p=0.015 | r=0.61<br>(0.19, 0.84)<br>p=0.009 | r=0.07<br>(-0.52, 0.62)<br>p=0.8   | r=0.66<br>(0.05, 0.91)<br>p=0.037 |
|                                                                         | Mean Relative abundance      | r=0.68<br>(0.52, 0.79)<br>p<0.001 | r=1<br>(1,1)<br>p<0.001           | r=0.55<br>(-0.03, 0.86)<br>P=0.061 | r=1<br>(0.99, 1)<br>p<0.001       |

\*Correlation was assessed using Pearson correlation using the shared genera present in both methods (See also **Figure 1C**, **S2-S4**, and **Table S2** and **S4**).

**Figure S1. Comparison of the library size on datasets processed by clustering-based OTU method (Qiime1) and a denoising algorithm (Qiime2) with or without contaminant removal.**

~ p<0.1, \* p<0.05

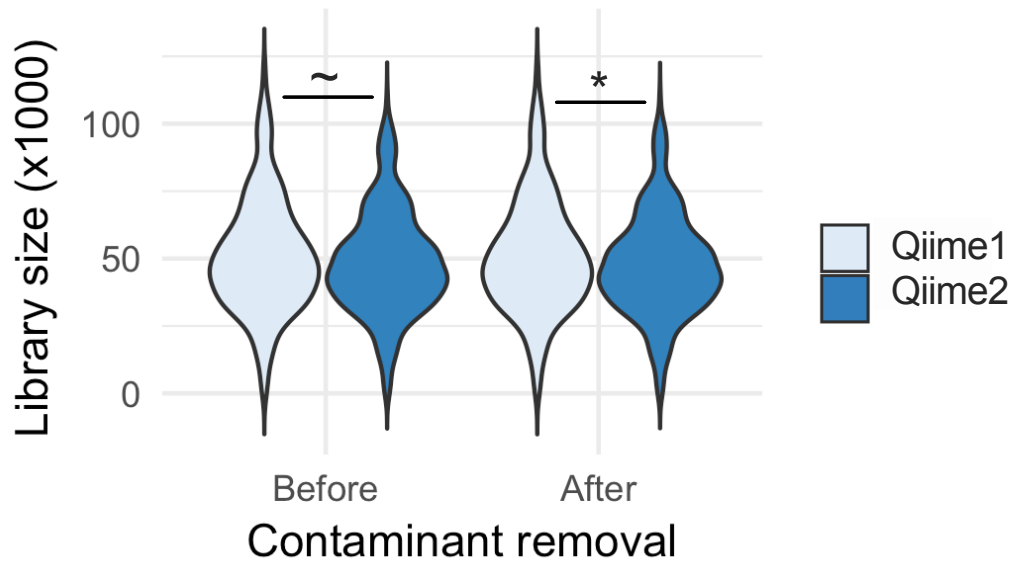

**Figure S2.** Comparison of the prevalence of bacterial genera on datasets processed by clustering-based OTU method (Qiime1) and a denoising algorithm (Qiime2) without contaminant removal. OTUs/ASVs with less than 20 total read count across each dataset and unclassified genera were excluded (n=234 shared genera included in the analysis). Each dot represents a classified genus. Contaminant removal doesn't impact the associations (not shown).

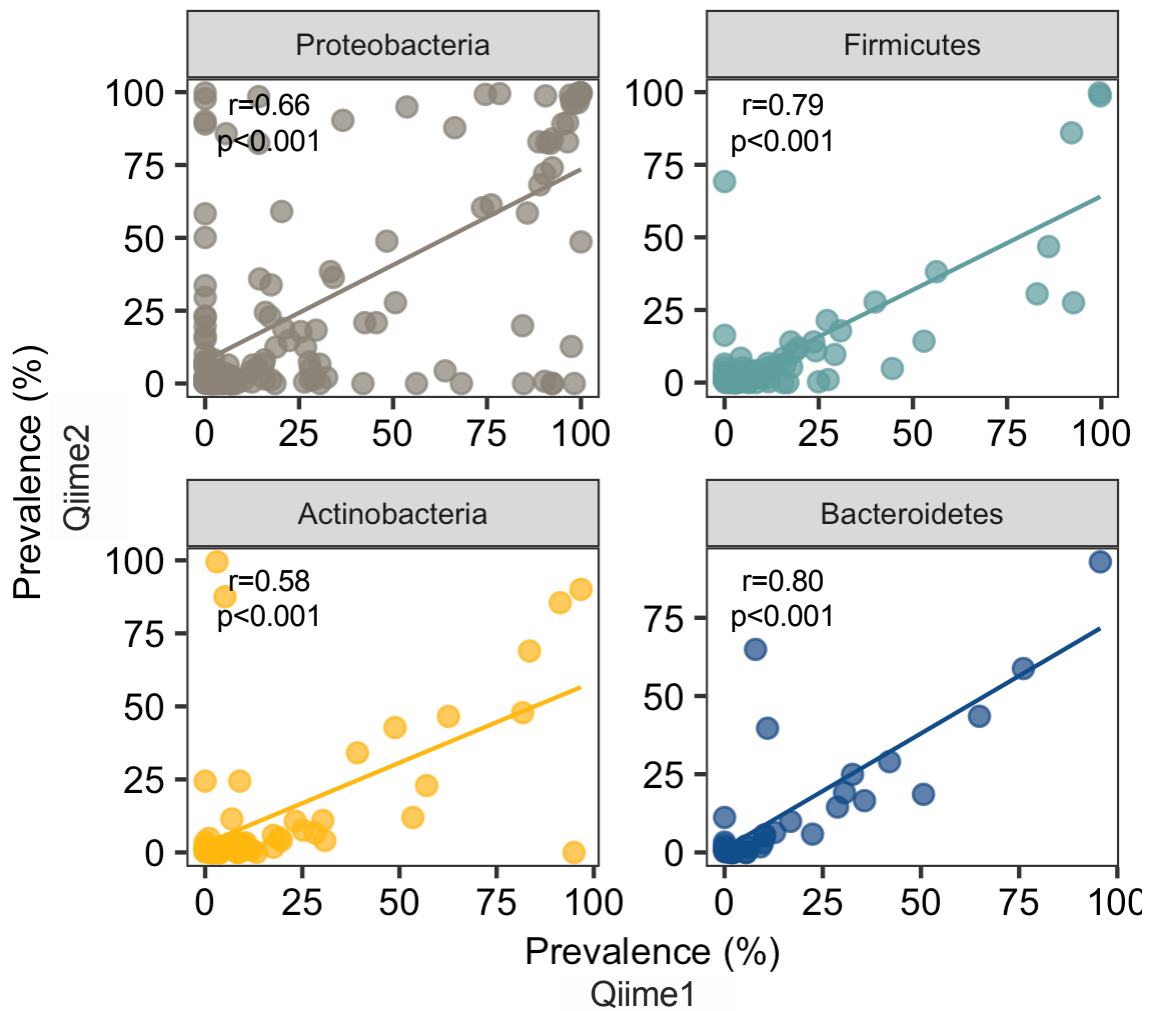

**Figure S3. Distribution of classified genera in Qiime1 and Qiime2 processed datasets without contaminant removal.** A) OTUs/ASVs > 20 total read count across each dataset. B) OTUs/ASVs > 0.01% mean relative abundance across each dataset.

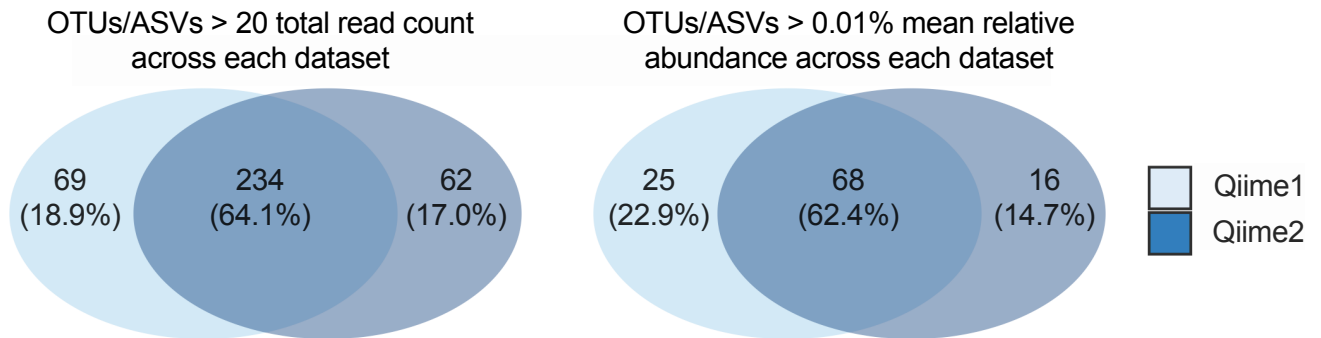

**Figure S4. Comparison of the relative abundance and prevalence of abundant bacterial genera (>0.01% mean relative abundance) on datasets processed by clustering-based OTU method (Qiime1) and a denoising algorithm (Qiime2) without contaminant removal. Unclassified genera were excluded (n=68 shared genera included in the analysis).**

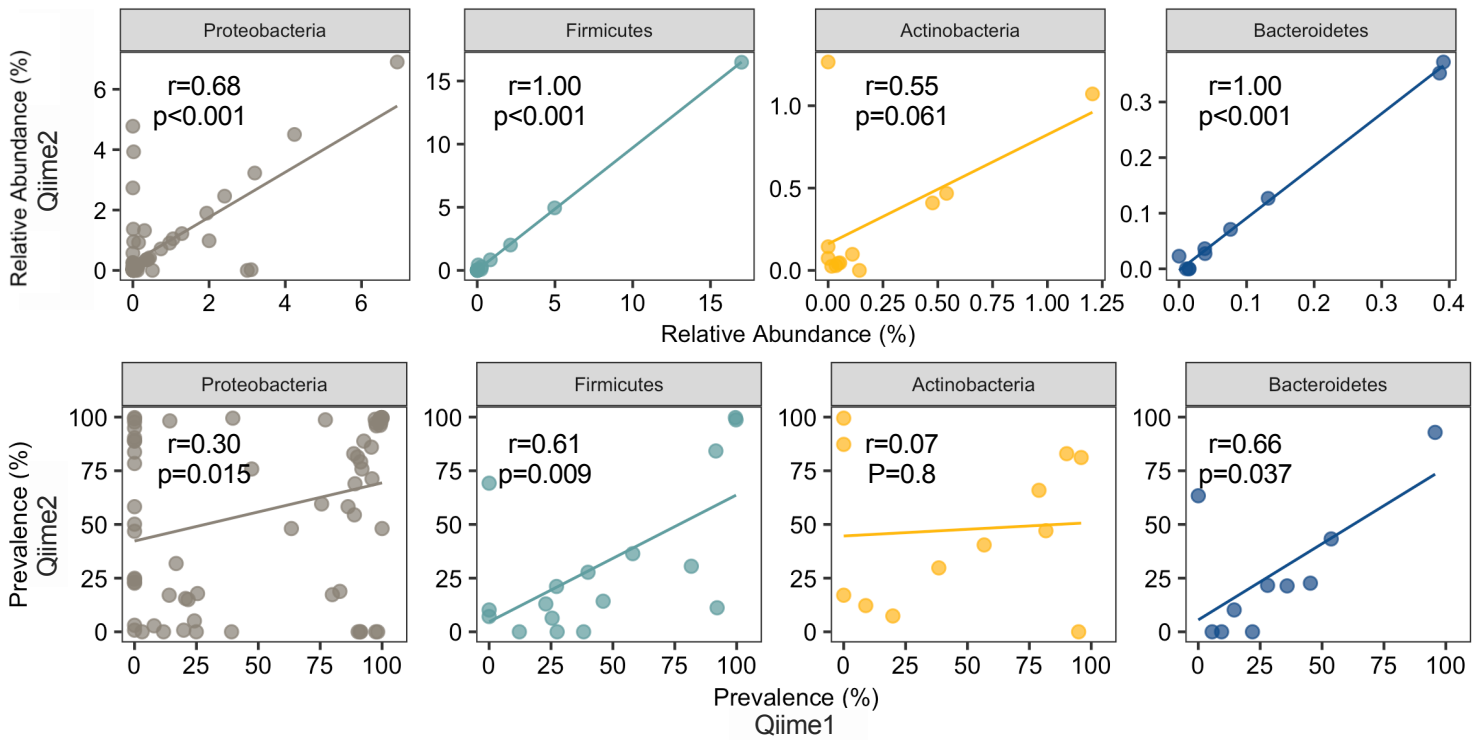



Figure S5. Comparison of the relative abundances of four abundant families (>1% mean relative abundance) on datasets processed by clustering-based OTU method (Qiime1) and a denoising algorithm (Qiime2) with or without contaminant removal. ANOVA test. \*\*\* p<0.001

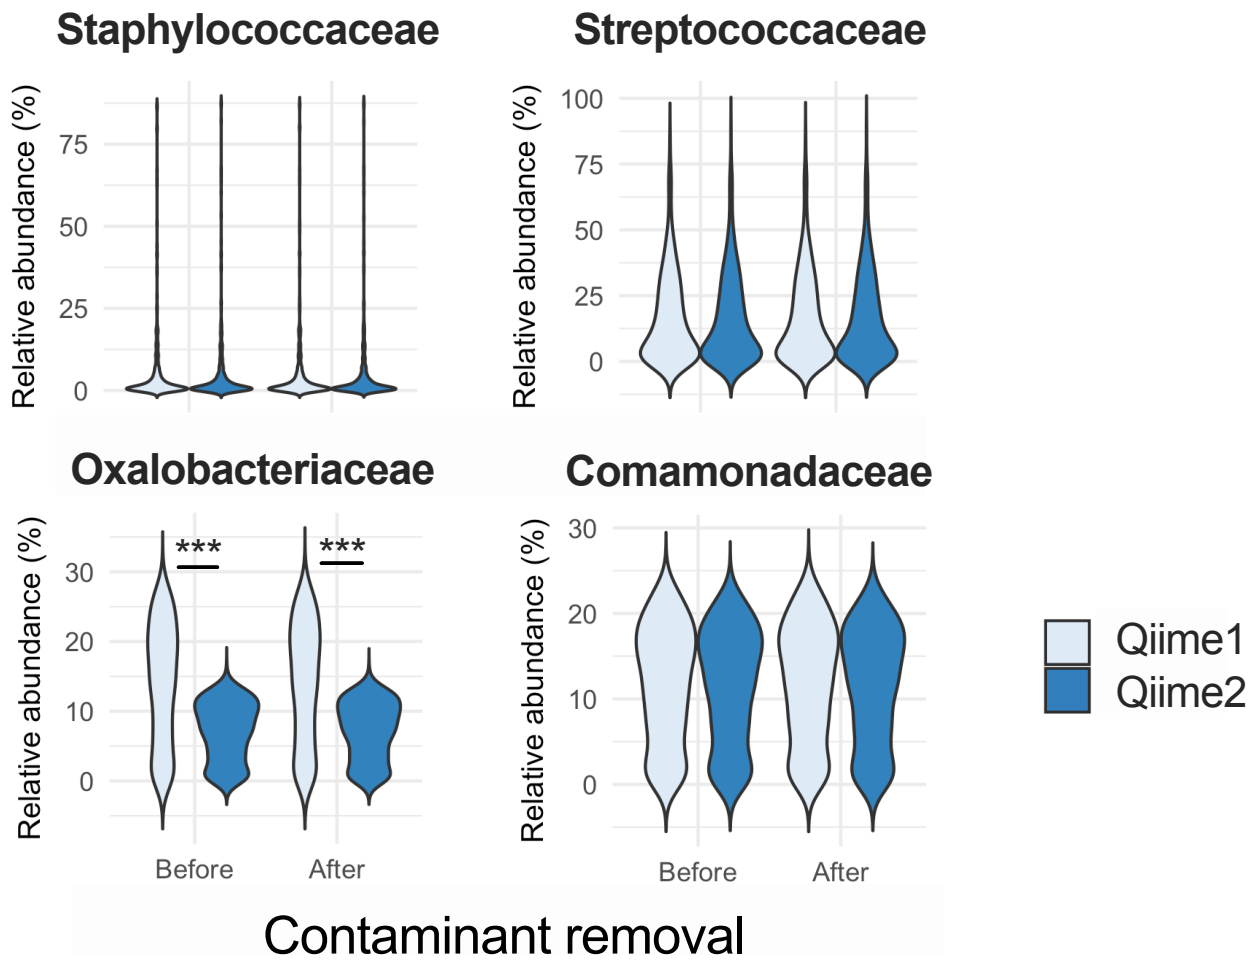

Supplement: 12866_2020_1949_MOESM1_ESM.pdf [file 12866_2020_1949_MOESM1_ESM.pdf]
